# Supplementary material for: Incremental Genetic Perturbations to MCM2-7 Expression and Subcellular Distribution Reveal Exquisite Sensitivity of Mice to DNA Replication Stress
Source: PLoS Genet. 2010 Sep 9;6(9):e1001110. doi: 10.1371/journal.pgen.1001110 (PMC2936539; doi:10.1371/journal.pgen.1001110)
Supplement: Figure S4 — Rescue of viability by Mcm3 hemizygosity. (0.06 MB PDF) [file pgen.1001110.s004.pdf]

# Supplemental Figure 4 -Rescue of viability by *Mcm3* hemizyosity

Cross: *Mcm4*<sup>C3/C3</sup> X *Mcm4*<sup>C3/C3</sup> *Mcm2*<sup>Gt/+</sup> *Mcm3*<sup>Gt/+</sup>

| Genotype:      | <i>M4</i> <sup>C3/C3</sup> | <i>M4</i> <sup>C3/C3</sup> <i>M3</i> <sup>Gt/+</sup> | <i>M4</i> <sup>C3/C3</sup> <i>M2</i> <sup>Gt/+</sup> | <i>M4</i> <sup>C3/C3</sup> <i>M2</i> <sup>Gt/+</sup> <i>M3</i> <sup>Gt/+</sup> |                |
|----------------|----------------------------|------------------------------------------------------|------------------------------------------------------|--------------------------------------------------------------------------------|----------------|
| Expected Ratio | 1/4                        | 1/4                                                  | 1/4                                                  | 1/4                                                                            |                |
| Expected #     | 52.3                       | 52.3                                                 | 52.3                                                 | 52.3                                                                           |                |
| Observed       | 66                         | 69                                                   | 24                                                   | 50                                                                             | FET P=7.12E-05 |
| Total          | 209                        | $\chi^2$ P= 2.12558E-05                              |                                                      |                                                                                |                |

Cross: *Mcm4*<sup>Gt/+</sup> X *Mcm4*<sup>C3/C3</sup> *Mcm3*<sup>Gt/+</sup>

| Genotypes:     | <i>Mcm4</i> <sup>C3/+</sup> | <i>Mcm4</i> <sup>C3/+</sup> <i>Mcm3</i> <sup>Gt/+</sup> | <i>Mcm4</i> <sup>C3/Gt</sup> | <i>Mcm4</i> <sup>C3/Gt</sup> <i>Mcm3</i> <sup>Gt/+</sup> |                |
|----------------|-----------------------------|---------------------------------------------------------|------------------------------|----------------------------------------------------------|----------------|
| Expected Ratio | 1/4                         | 1/4                                                     | 1/4                          | 1/4                                                      |                |
| Expected #     | 61.75                       | 61.75                                                   | 61.75                        | 61.75                                                    |                |
| Observed       | 99                          | 101                                                     | 7                            | 40                                                       | FET P=7.14E-05 |
| Total          | 247                         | $\chi^2$ P= 2.58374E-22                                 |                              |                                                          |                |

Cross: *Mcm4*<sup>C3/C3</sup> X *Mcm4*<sup>C3/C3</sup> *Mcm3*<sup>Gt/+</sup> *Mcm6*<sup>Gt/+</sup>

| Genotypes:     | <i>Mcm4</i> <sup>C3/C3</sup> | <i>Mcm4</i> <sup>C3/C3</sup> <i>Mcm3</i> <sup>Gt/+</sup> | <i>Mcm4</i> <sup>C3/C3</sup> <i>Mcm6</i> <sup>Gt/+</sup> | <i>Mcm4</i> <sup>C3/C3</sup> <i>Mcm3</i> <sup>Gt/+</sup> <i>Mcm6</i> <sup>Gt/+</sup> |             |
|----------------|------------------------------|----------------------------------------------------------|----------------------------------------------------------|--------------------------------------------------------------------------------------|-------------|
| Expected Ratio | 1/4                          | 1/4                                                      | 1/4                                                      | 1/4                                                                                  |             |
| Expected #     | 27.0                         | 27.0                                                     | 27.0                                                     | 27.0                                                                                 |             |
| Observed       | 35                           | 47                                                       | 9                                                        | 17                                                                                   | FET P= 0.15 |
| Total          | 108                          | $\chi^2$ P= 3.39925E-07                                  |                                                          |                                                                                      |             |
